# Supplementary material
Source: Springer Nature journal article supplement (https://www.springermedizin.de/resource/supplementary/12889_2010_3119_MOESM1_ESM.pdf/9488030)

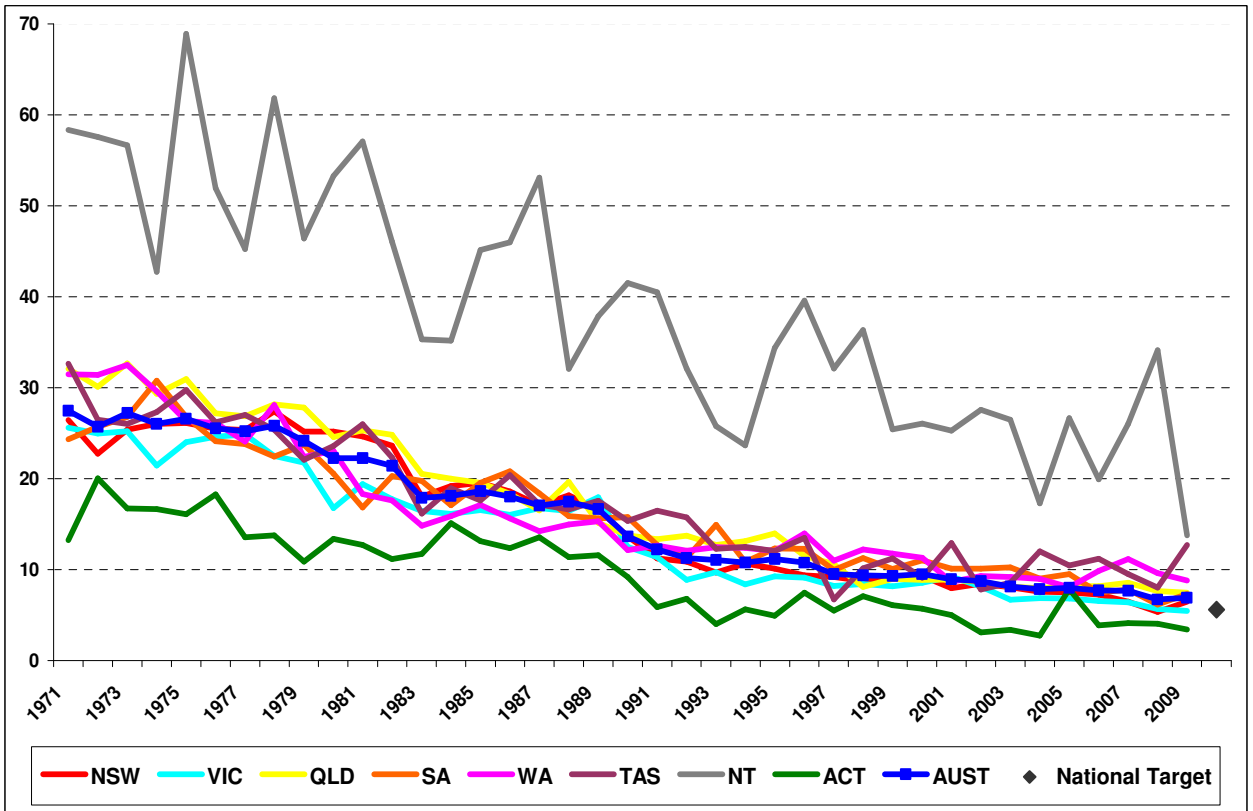

Sources: [19, 35-36]

Supplement: MOESM1 [file 9488030]
